# Supplementary figures and images for: Silicon-based nanowires from silicon wafers catalyzed by cobalt nanoparticles in a hydrogen environment
Source: Royal Society of Chemistry journal article supplement (doi:10.1039/b417740a), 2005-01-01

## Supplementary data

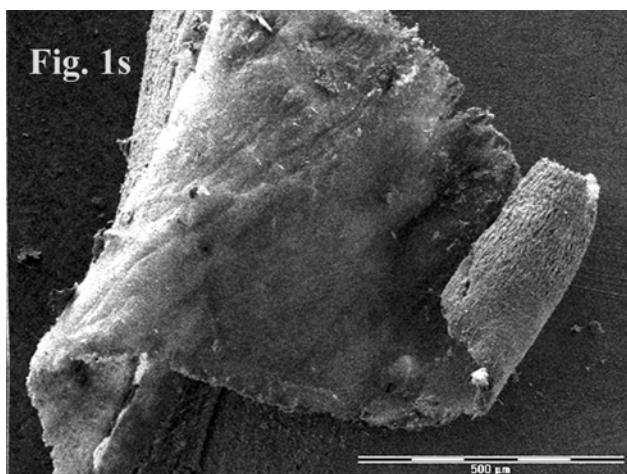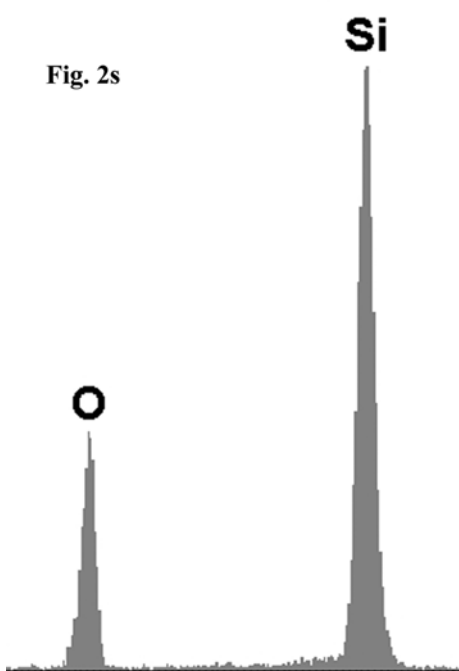

Supplement: b417740a.pdf [file b417740a.pdf]
